# Supplementary material
Source: HighWire-hosted journal article supplement (https://bmjopen.bmj.com/content/13/4/e066070)
Supplement: inline-supplementary-material-6 [file inline-supplementary-material-6.pdf]

# TOAST

## Evidence - and guideline - based rational decision tree for treating possible reflux symptoms in postoperative OA/TOF

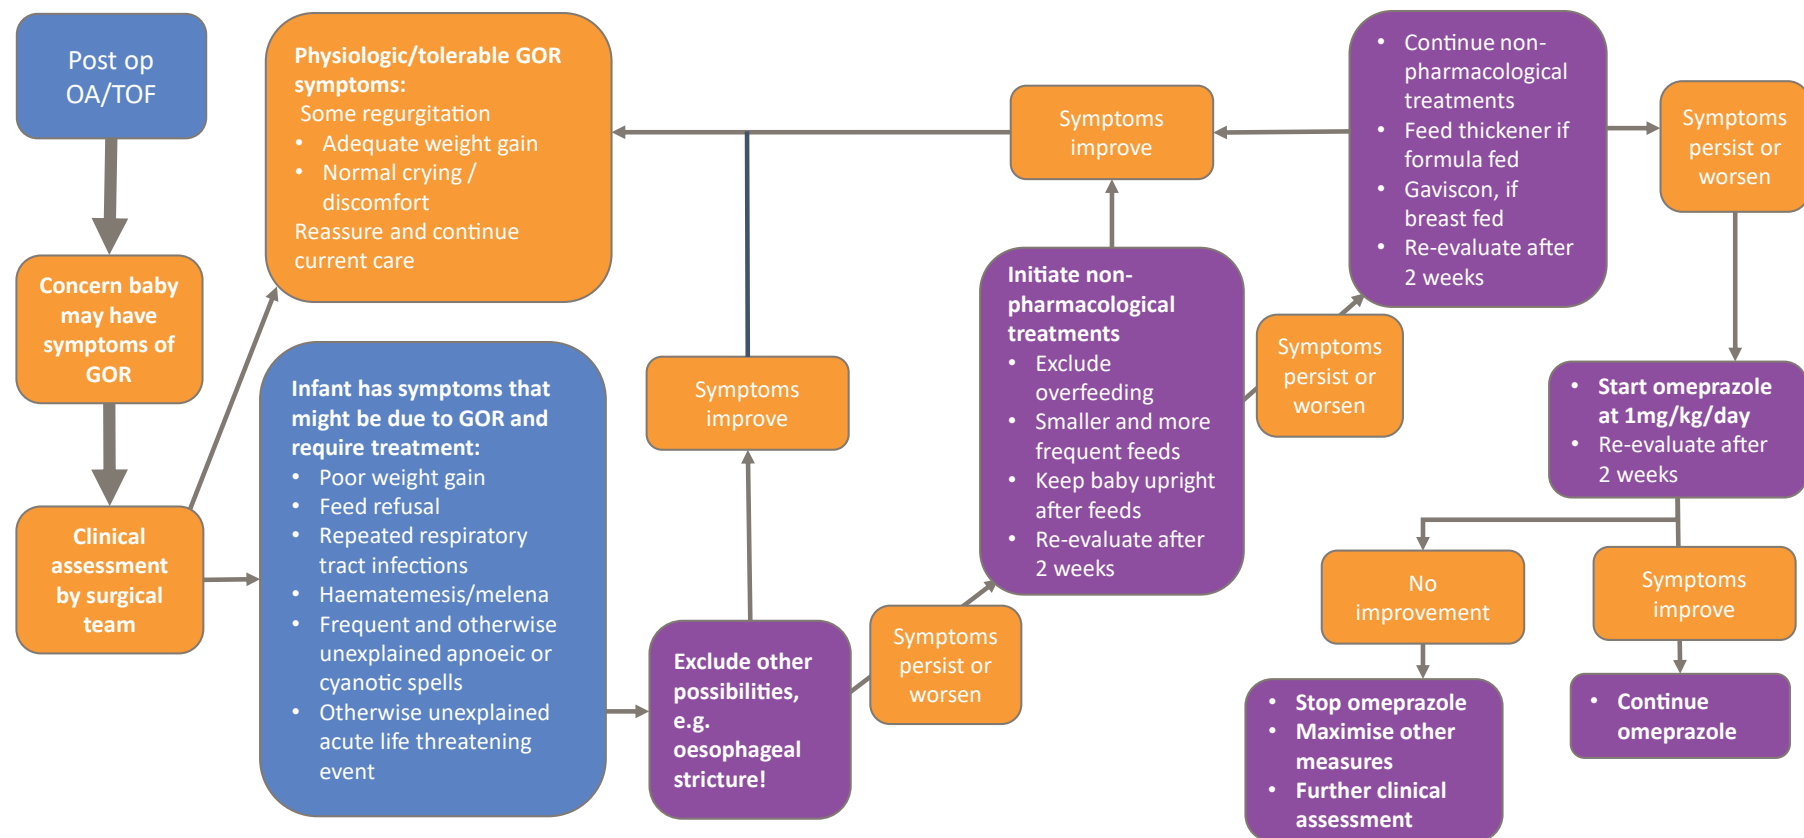

N.B. If you feel that urgent treatment is needed, clinical judgement takes precedence over the above.
